# Supplementary material
Source: PubMed Central journal article supplement (PMC4194121)
Supplement: embj0033-1304-sd1.pdf [file embj0033-1304-sd1.pdf]

# Wang et al. Supplementary Fig.1

|                 |   |                                                               |    |
|-----------------|---|---------------------------------------------------------------|----|
| H. SAPIENS      | 1 | -----MAEQVALSRTQVCGILREELFQGDAFHQSDTHIFIIMGASGDLAKKKIYPTIWWLF | 56 |
| M. MUSCULUS     | 1 | -----MAEQVALSRTQVCGILREELYQGDAFHQADTHIFIIMGASGDLAKKKIYPTIWWLF | 56 |
| D. MELANOGASTER | 1 | -MATQKEDHTALDLIISLKSPTMVCBEGTHFDGKIPHTFVIFGASGDLAKKKIYPTLWWLY | 60 |
| C. ELEGANS      | 1 | MACKRHSVSDPISK-DLVECLRESMQRDLKFE--TPYVFVIFGASGDLAKKKIYPTLWWLF | 58 |
| S. POMBE        | 1 | -----MSSANLSIKENG--AMVVFASGDLSSKKKTFPALFSLF                   | 36 |
| S. CEREVISIAE   | 1 | -----MSEGPVKFEKNT--VISVFASGDLAKKKTFPALFGLF                    | 36 |
| A. THALIANA     | 1 | -MSGG--QWVHEKRSTFRNDSFVREYIVPETGCLSI-IVL GASGDLAKKKTFPALFNLY  | 63 |

**GxxGDLA: nucleotide-binding fingerprint**

K89

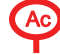

|                 |    |                                                                |     |
|-----------------|----|----------------------------------------------------------------|-----|
| H. SAPIENS      | 57 | RDGLL-PENTFIVGYARSRLT-VADIRKQSEPPFKATP---EEKLKLEDFFARNSYVAGQY  | 112 |
| M. MUSCULUS     | 57 | RDGLL-PEDTFIVGYARSRLT-VDDIRKQSEPPFKATP---EERPKLEEFFARNSYVAGQY  | 112 |
| D. MELANOGASTER | 61 | RDDL-L-PKPTKFCGYARSMLT-VDSIKEQCLPYMKVQP---HEQKKYEEFWALNEVYSGRY | 116 |
| C. ELEGANS      | 59 | RDNLL-PVNIKFIIGYARSDLT-VFKLRESFEKNCKVRE---NEKCAFDDFIKCCSYVQGQY | 114 |
| S. POMBE        | 37 | SEGR-L-PKDIRIVGYARSKIE-HEDFLDRITQNIKIDEEDSQAKEKLEEFKRCYSYRGSY  | 92  |
| S. CEREVISIAE   | 37 | REGYL-DPSTKIFGYARSKLSMEEDLKSRLPHLKKPHGE-ADDSKVEQFFKMVSYISGNY   | 93  |
| A. THALIANA     | 44 | RQGFLNPDEVHIFGYARTKIS-DEELRDRIRGYLVDEKNA-EQAEALSKFLQLIKYVSGPY  | 113 |

K171

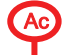

**Nine-residue peptide: G6P binding and catalysis**

|                 |     |                                                                   |     |
|-----------------|-----|-------------------------------------------------------------------|-----|
| H. SAPIENS      | 161 | Q---IGWNRIVIEKPFGRDLQSSDRLSNHISLFRDQIYRIDHYLGKEMVQNLMLVLRVAN      | 218 |
| M. MUSCULUS     | 161 | Q---TGWNRIVIEKPFGRDLQSSNQLSNHISLFRDQIYRIDHYLGKEMVQNLMLVLRVAN      | 218 |
| D. MELANOGASTER | 165 | V---CGWNRVIEKPFGRDDASSQALS DHLAGLFQEDQLYRIDHYLGKEMVQNLMTIRFGN     | 222 |
| C. ELEGANS      | 166 | HG--DSWTRVIEKPFGRHDLKSSCELSTHLAKLFKEDQIYRIDHYLGKEMVQNLMLVLRFGN    | 224 |
| S. POMBE        | 145 | E---KGIARLVIEKPFVLDLKSQAELQSQLAPLFDKEIYRIDHYLGKEMVQNLVHLRFCN      | 202 |
| S. CEREVISIAE   | 147 | E---NGITRVIVIEKPFGRHDLASARELQKNLGPLFKEEELYRIDHYLGKELVKNLLVLRFGN   | 204 |
| A. THALIANA     | 169 | KSDLGGWTRIVIEKPFGRDLKLESAEQQLSSQIGALFEPEQIYRIDHYLGKELVQNLMLVLRVAN | 229 |

**EKPxG : nucleotide-binding fingerprint**

K386

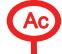

K403

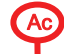

|                 |     |                                                                 |     |
|-----------------|-----|-----------------------------------------------------------------|-----|
| H. SAPIENS      | 361 | ALNERKAEVRLQFHDVAGDIF-HQQCKRNLVIRVQPNNAVYTKMMTKKPGMFFNPEESEL    | 420 |
| M. MUSCULUS     | 361 | ALNERKAEVRLQFRDVAGDIF-HQQCKRNLVIRVQPNNAVYTKMMTKKPGMFFNPEESEL    | 420 |
| D. MELANOGASTER | 366 | ALNERKAEVRIQYQDVPDGF-EGNTKRNLVIRVQPGAEALYFKMMTKKSPGITFDIEETEL   | 425 |
| C. ELEGANS      | 368 | ALNEKKAEVRIQFKEVSGDIYPSGELKRSELVIRVQPNNAVYTKMMTKKPGMGFVEETEL    | 428 |
| S. POMBE        | 342 | AMDIGKVEIRVQFKAAANGLF--KDAYHNELVIRVQPDIAIYFKMNIKQPGLEAPLLTDL    | 400 |
| S. CEREVISIAE   | 344 | ALNESKVEIRLQYKAVASGVF--KDI PNDELVIRVQPDAAVYLKFNAPKTPGLSNATQVTDL | 402 |
| A. THALIANA     | 362 | AMSSKKADIRIQFKDVPDGFDFKQCNQGRNEFVIRLQVSEAMYMKLTVKQPGLDMNTVQSEL  | 421 |

K432

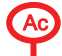

|                 |     |                                                                |     |
|-----------------|-----|----------------------------------------------------------------|-----|
| H. SAPIENS      | 421 | DLTYGNRYKNVLPDAYERLILDVFCGSMHFVRSDELREAWRIFTPLLHQIEL-EKPKPI    | 480 |
| M. MUSCULUS     | 421 | DLTYGNRYKNVLPDAYERLILDVFCGSMHFVRSDELREAWRIFTPLLHKIDR-EKQPPI    | 480 |
| D. MELANOGASTER | 426 | DLTYEHRKDSYLPDAYERLILDVFCGSMHFVRSDELREAWRIFTPILHQIEK-EHIRPI    | 485 |
| C. ELEGANS      | 429 | DLTYNNRFKEVRLPDAYERLFLEVFMSQINFVRTDELEYAWRILTPVLEELK-KKVQPV    | 488 |
| S. POMBE        | 401 | DLTYSRRFKNKLHEA YEALFLDAFAGDQSRFARIDELECAWSLVDP LLKYMEE-EKPVPE | 460 |
| S. CEREVISIAE   | 403 | NLTYASRYQDFWIPEAYEVLIRDALLDGHSNFVRDDELDISWGIFTPLLKHIERPDGPTPE  | 463 |
| A. THALIANA     | 422 | DLSYGQRYQGVAIPEAYERLILDTIKGDQQHFVRRDELKVAVEIFTPLLHRIDK-GEV KSI | 481 |

K497

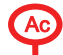

K514

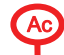

|                 |     |                                               |     |
|-----------------|-----|-----------------------------------------------|-----|
| H. SAPIENS      | 481 | PYIYGSRGPTAEDELMKRVGFQYE--GTYK--WV-----NPHKL  | 515 |
| M. MUSCULUS     | 481 | PYVYGSRGPTAEDELMKRVGFQYE--GTYK--WV-----NPHKL  | 515 |
| D. MELANOGASTER | 486 | TYQYGSRGPKADRCKEENNFKYS--GSYK--WHGGKAATSNH--- | 524 |
| C. ELEGANS      | 489 | QYKFGSRGPTGDELMMKYGFIFT--GTYK--WV-----APK-L   | 522 |
| S. POMBE        | 461 | PYEGSDGPECLYSFLKKGFIYDSDPYD--YVMS---VPSDH     | 500 |
| S. CEREVISIAE   | 464 | IYPYGSRGPKGLKEYMQKHKYVMPEKHPYA--WPVTKPEDTKDN- | 505 |
| A. THALIANA     | 482 | PYKPGSRGPKAQDQLEKAGYLQT--HGVI--WI-----PPTL    | 515 |

**Supplementary Fig.1 K403 of G6PD is evolutionarily conserved from yeast to human.**

Sequences of G6PD from various species were aligned, and the acetylated lysine residues of G6PD identified by MS study (Choudhary et al, 2009) were colored in red.
