# Supplementary material
Source: PubMed Central journal article supplement (PMC4194121)
Supplement: embj0033-1304-sd2.pdf [file embj0033-1304-sd2.pdf]

## Wang et al. Supplementary Fig.2

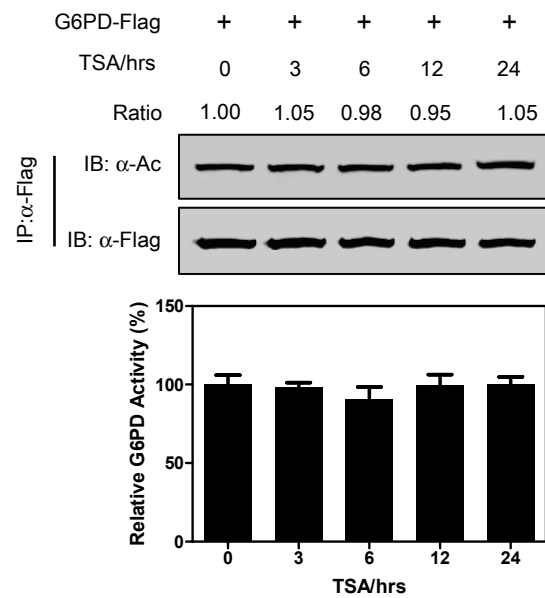

### Supplementary Fig.2 TSA treatment does not change G6PD acetylation and activity

HEK293T cells overexpressing Flag-tagged G6PD were treated with TSA for the indicated periods. Acetylation levels and enzyme activity of Flag-bead-purified G6PD were determined by western blot analysis and enzyme assay, respectively. Shown are average values with standard deviation (S.D.) of triplicated experiments.
