# Supplementary material
Source: PubMed Central journal article supplement (PMC4194121)
Supplement: embj0033-1304-sd3.pdf [file embj0033-1304-sd3.pdf]

### Wang et al. Supplementary Fig.3

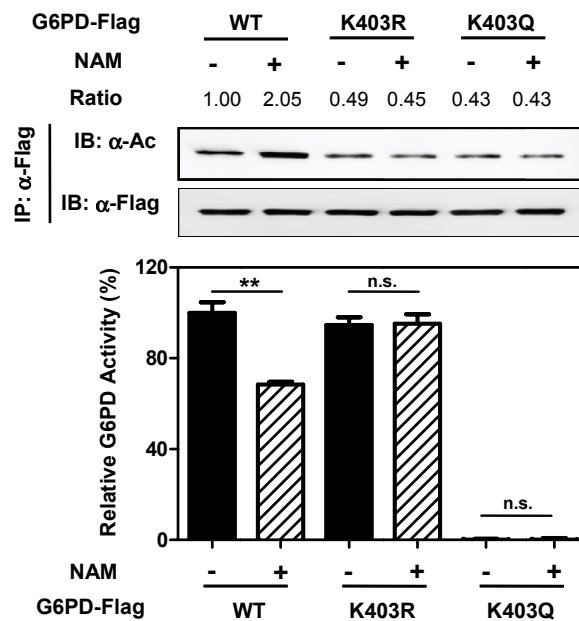

### Supplementary Fig.3 G6PD K403 mutant displays negligible response in changing acetylation and activity upon NAM treatment

Flag-tagged wild-type G6PD, K403R/Q mutants were each expressed in HEK293T cells, following treatments with or without 15 mM NAM. Acetylation levels and activity of G6PD were determined. Shown are average values with standard deviation (S.D.) of triplicated experiments. \*\*denotes the  $p < 0.01$  for the indicated comparison; n.s.=not significant. G6PD acetylation levels were normalized against Flag.
