# Supplementary material
Source: PubMed Central journal article supplement (PMC4194121)
Supplement: embj0033-1304-sd4.pdf [file embj0033-1304-sd4.pdf]

Wang et al. Supplementary Fig.4

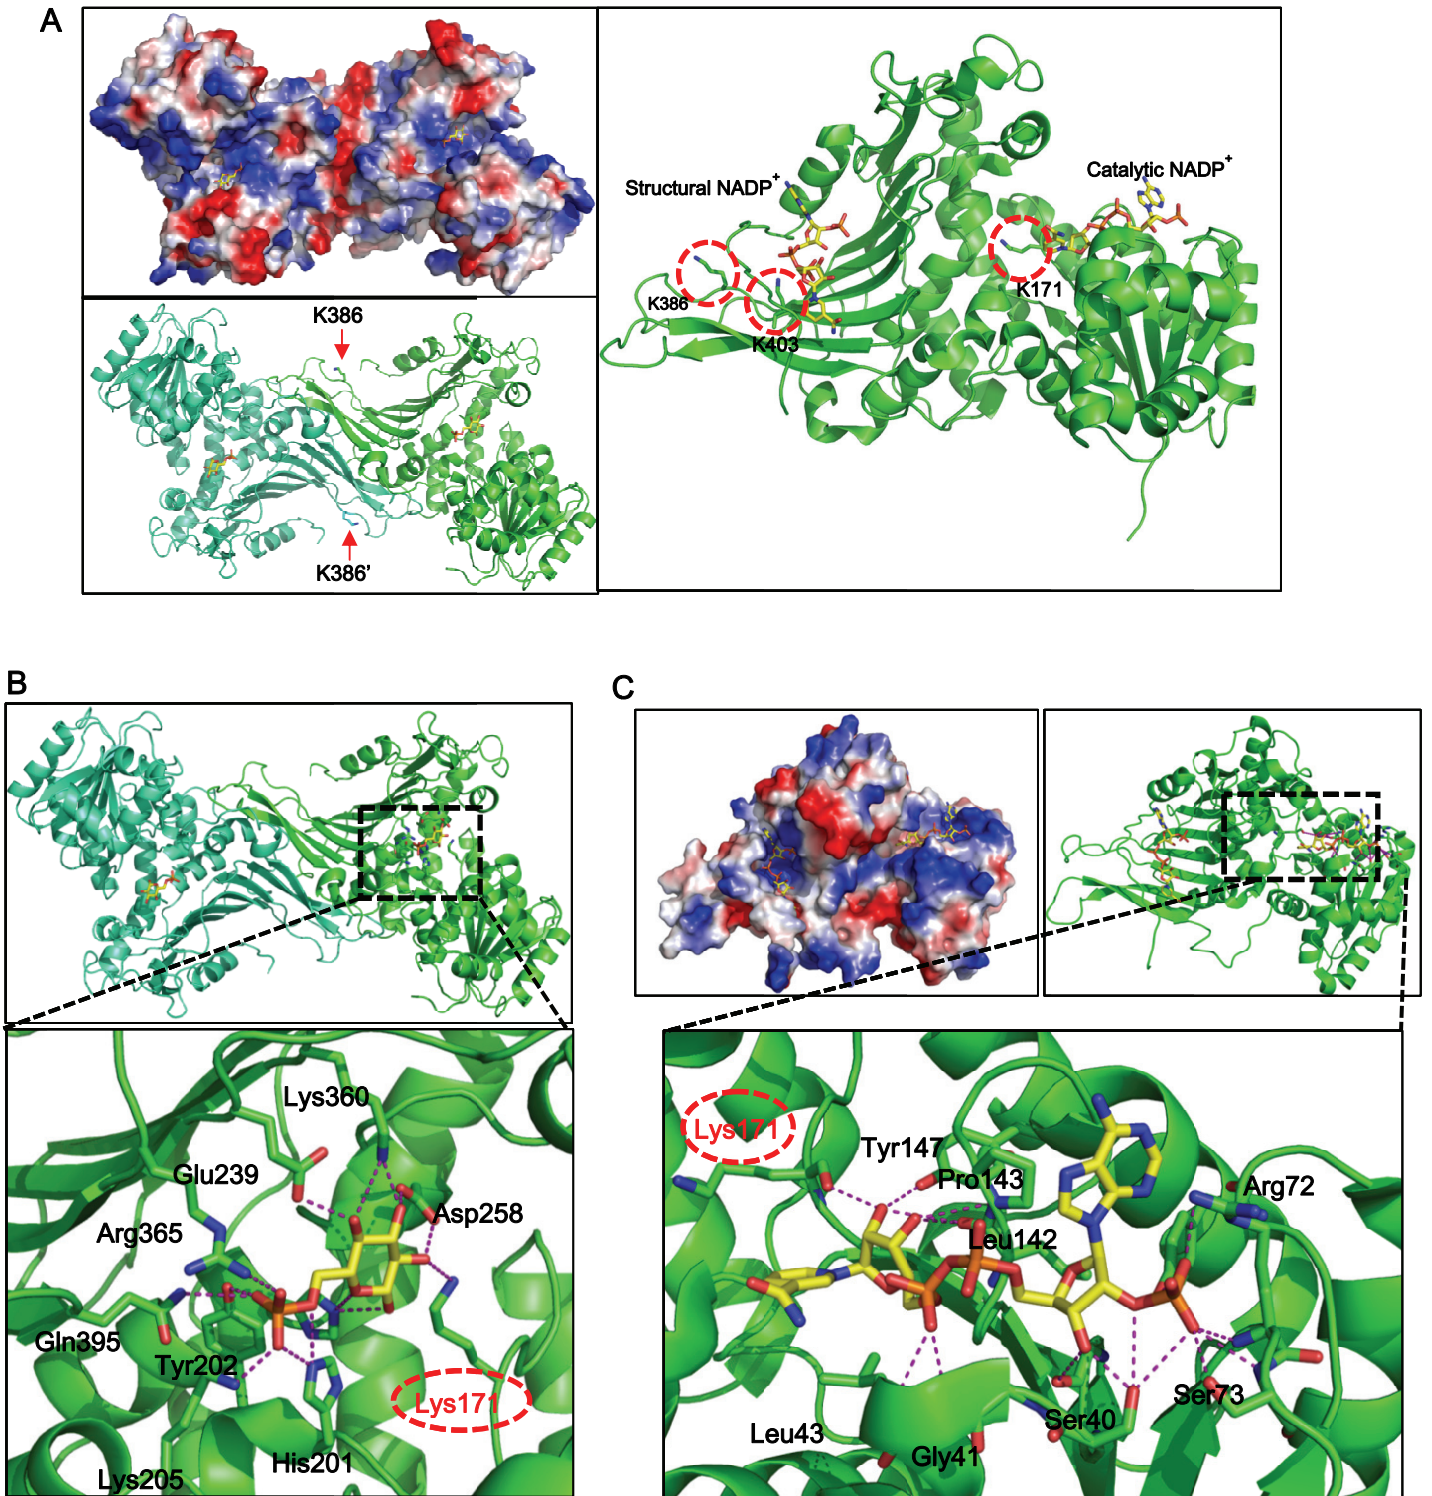

**Supplementary Fig.4 A structural illustration for K403, K171, and K386 within the G6PD protein**

Cartoon representation of dimeric G6PD structure (PDB ID: 2BH9 and 2BHL) (Kotaka et al, 2005) made by using Pymol [www.pymol.org](http://www.pymol.org)). **(A)** An overview of K171, K386, or K403 position within the G6PD protein structure. Upper left, electrostatic (G6PD) and stick (G6P) representation of the crystal structure of G6P bound to G6PD; Lower left, K386 lies to the interface of G6PD dimer; Right panel, shown is a ribbon (G6PD) and stick (structural and catalytic NADP<sup>+</sup>) representation of G6PD bound to NADP<sup>+</sup>. The protein and NADP<sup>+</sup> are colored in green and yellow, respectively. Red dotted circle indicates the 3D location of K171, K386, and K403.

**(B-C)** K171 interacts with both G6P and catalytic NADP<sup>+</sup>. The protein is colored in green, and G6P **(B)** and NADP<sup>+</sup> **(C)** are marked in yellow, with the interacting residues in G6PD being highlighted in magenta.
