# Supplementary material
Source: PubMed Central journal article supplement (PMC4194121)
Supplement: embj0033-1304-sd5.pdf [file embj0033-1304-sd5.pdf]

## Wang et al. Supplementary Fig.5

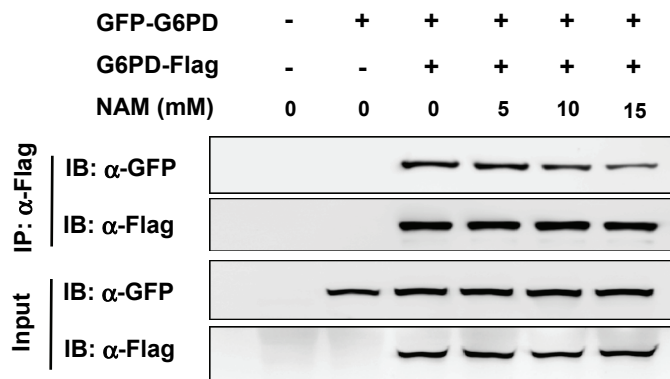

### Supplementary Fig.5 NAM treatment impairs the protein interaction between G6PD subunits in a dose-dependent manner

GFP-tagged and Flag-tagged G6PD were co-expressed in HEK293T cells. Cells were treated with increasing concentrations of NAM for 4 hrs, and the interaction between two differently tagged proteins was determined by western blotting.
