# Supplementary material
Source: PubMed Central journal article supplement (PMC4194121)
Supplement: embj0033-1304-sd6.pdf [file embj0033-1304-sd6.pdf]

Wang et al. Supplementary Fig.6

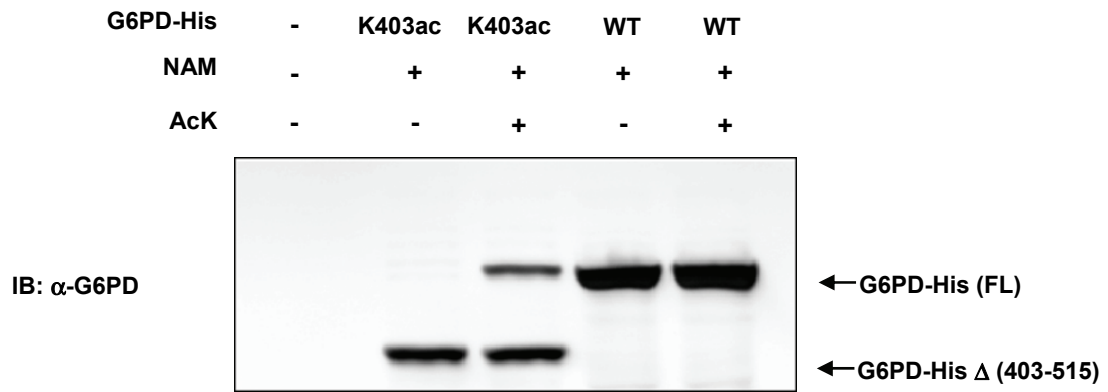

**Supplementary Fig.6 *In vitro* site-specific incorporation of acetylated K403 in G6PD**

Addition of acetyl-lysine induced the production of full length (FL) K403 acetylated G6PD. Recombinant K403-acetylated G6PD was expressed in *E.coli* BL21 cells as described in "Method".
