# Supplementary material
Source: PubMed Central journal article supplement (PMC4194121)
Supplement: embj0033-1304-sd7.pdf [file embj0033-1304-sd7.pdf]

Wang et al. Supplementary Fig.7

**A**

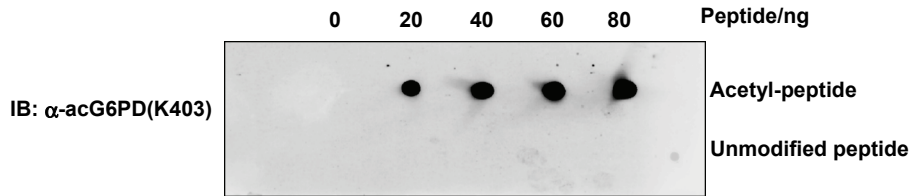

**B**

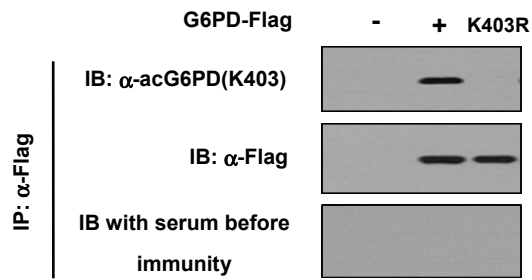

**C**

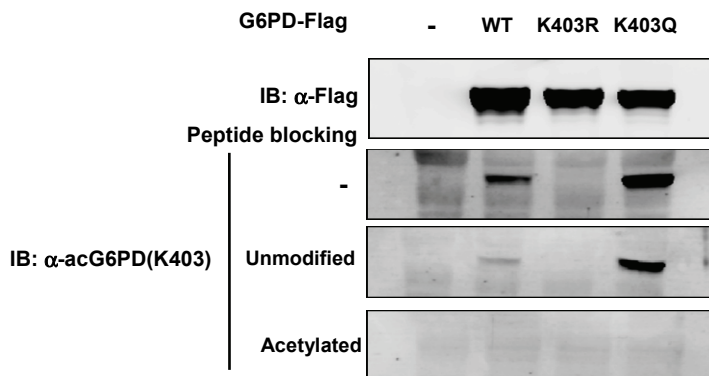

**Supplementary Fig.7 Characterization of the specificity of the  $\alpha$ -acG6PD(K403) antibody**

**(A)** Different amounts of acetyl-K403 peptide or unmodified peptide were spotted on nitrocellulose membrane, and the antibody specificity was determined by dot-blot assay.

**(B)** Immunoprecipitated Flag-tagged wild-type G6PD, but not its K403R mutant, was recognized by the  $\alpha$ -acG6PD(K403) antibody, but not by serum before immunity.

**(C)** The recombinant K403-acetylated K403 peptide, but not the unmodified peptide, could compete for binding to acetylated G6PD.
