# Supplementary material
Source: PubMed Central journal article supplement (PMC4194121)
Supplement: embj0033-1304-sd8.pdf [file embj0033-1304-sd8.pdf]

# Wang et al. Supplementary Fig.8

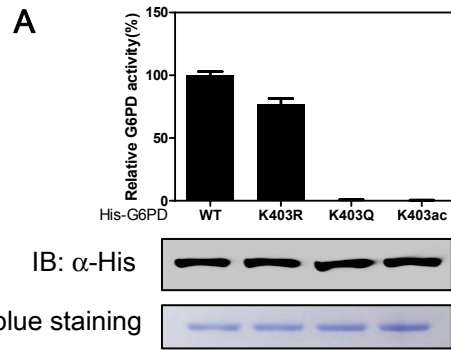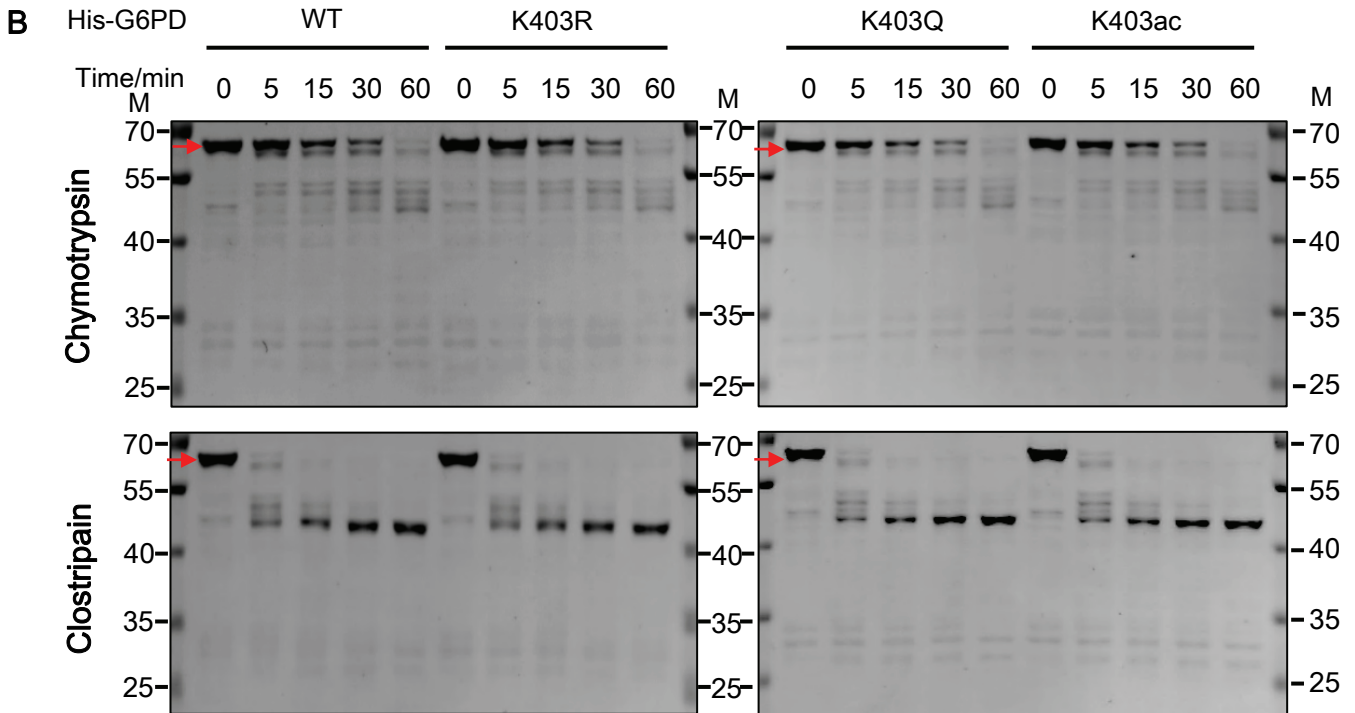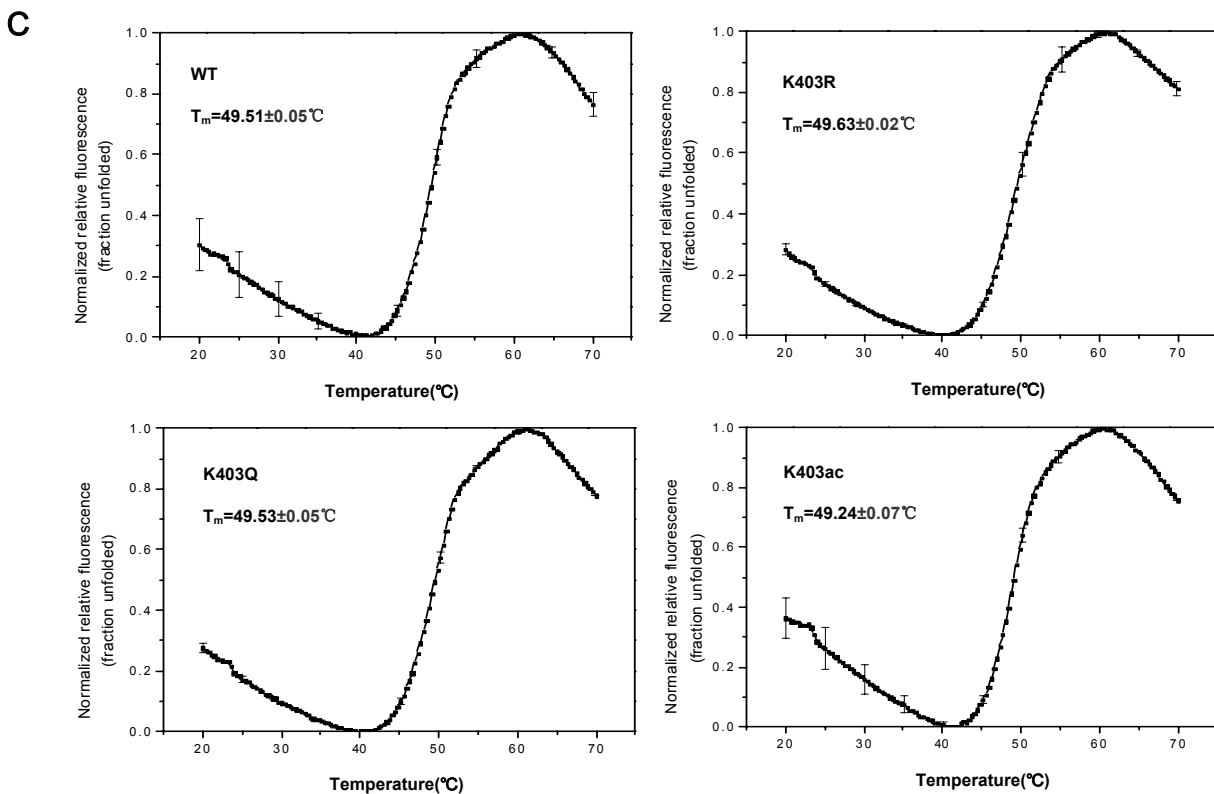

**Supplementary Fig.8. The recombinant mutant G6PD is correctly folded, but is catalytically inactive**

His-tagged wild-type G6PD, K403R/Q mutants, and the recombinant mutant G6PD (G6PD<sup>K403ac</sup> protein) were expressed and purified from *E.coli*, followed by enzyme activity assay **(A)**. Moreover, these recombinant proteins were digested with proteases, chymotrypsin (upper) or clostripain (lower) for the indicated periods **(B)**. Undigested protein served as zero time point (red arrow). M denotes molecular weight marker (kDa). In addition, these recombinant proteins were measured for their thermodynamic stability by using SYPRO-Orange method as described in “Method” **(C)**. Shown are average values with standard deviation (S.D.) of triplicated experiments.
