# Supplementary material
Source: PubMed Central journal article supplement (PMC4194121)
Supplement: embj0033-1304-sd10.pdf [file embj0033-1304-sd10.pdf]

Wang et al. Supplementary Fig.10

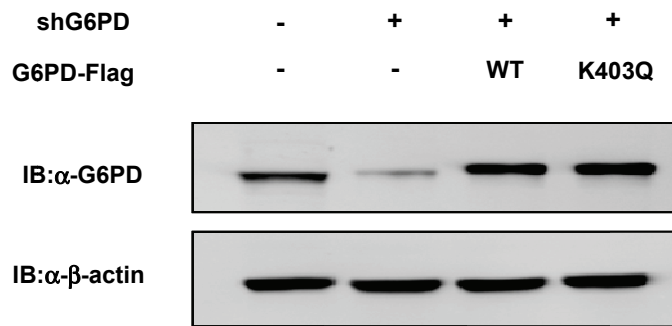

**Supplementary Fig.10 Generation of stable *G6PD* knock-down and rescue cells**

HEK293T cells with stable knockdown of endogenous *G6PD* were transiently transfected with plasmids expressing the indicated proteins. The presence of ectopically expressed proteins was verified by western blotting.
