# Supplementary material
Source: PubMed Central journal article supplement (PMC4194121)
Supplement: embj0033-1304-sd11.pdf [file embj0033-1304-sd11.pdf]

Wang et al. Supplementary Fig.11

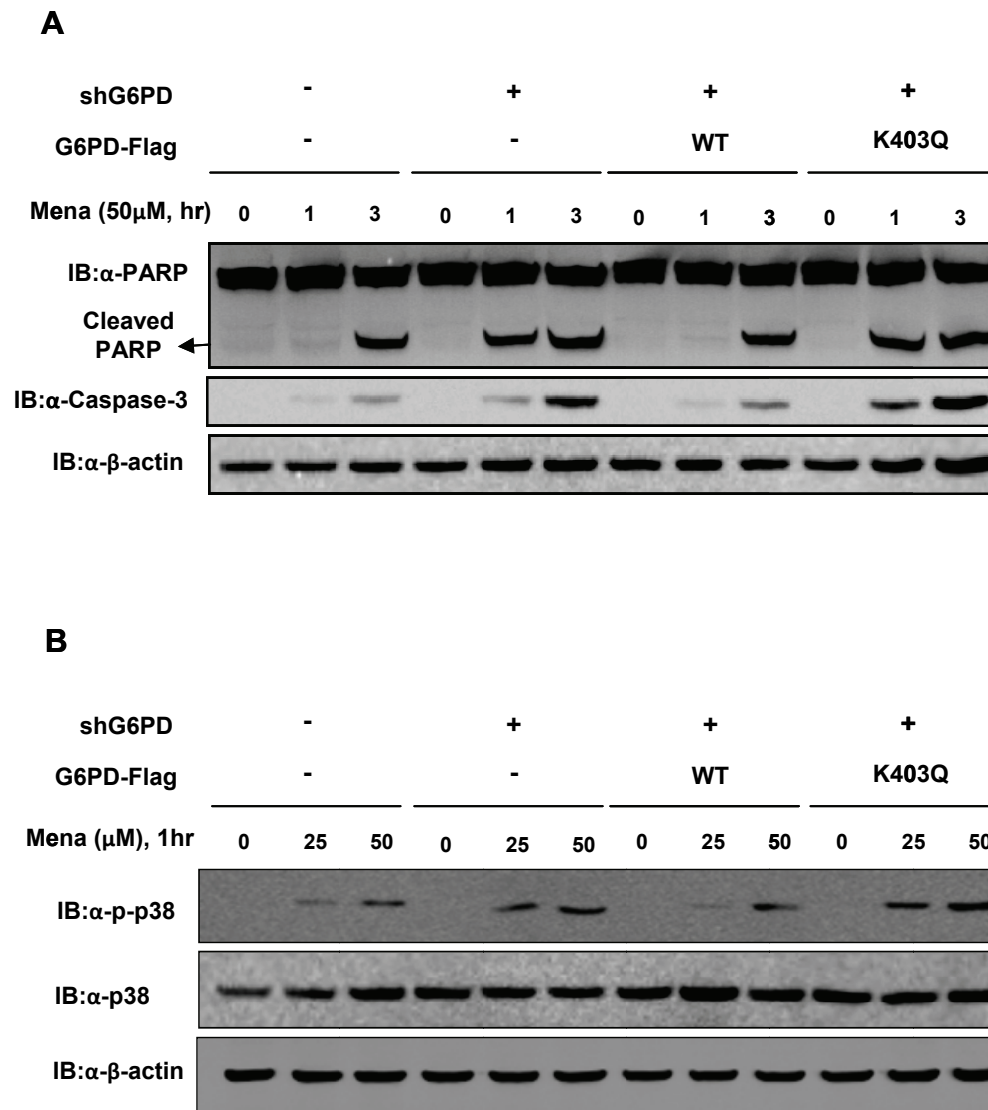

**Supplementary Fig.11 Determination of ROS-related signaling pathways**

**in *G6PD* knock-down and rescue cells after menadione treatment**

*G6PD* knock-down cells or these cells rescued by WT *G6PD* or the K403Q mutant were treated with menadione (50  $\mu$ M) for the indicated periods. The expression levels of candidate proteins involved in ROS-related signaling pathways, including PARP, Caspase-3, and p38 MAPK phosphorylation were determined by western blot analysis.
