# Supplementary material
Source: PubMed Central journal article supplement (PMC4194121)
Supplement: embj0033-1304-sd13.pdf [file embj0033-1304-sd13.pdf]

Wang et al. Supplementary Fig.13

**A**

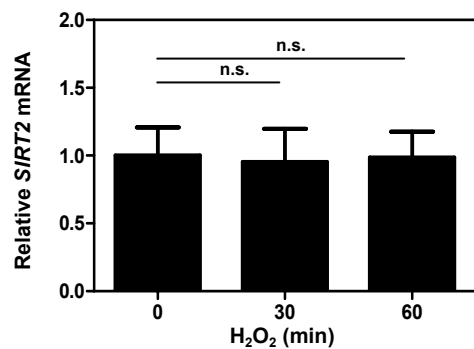

**B**

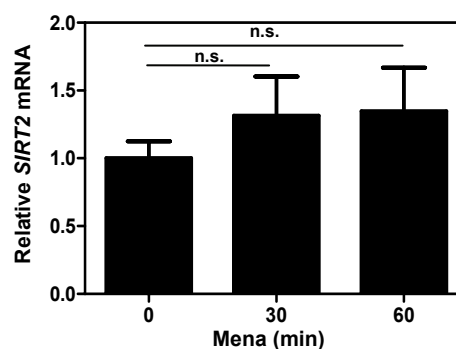

**C**

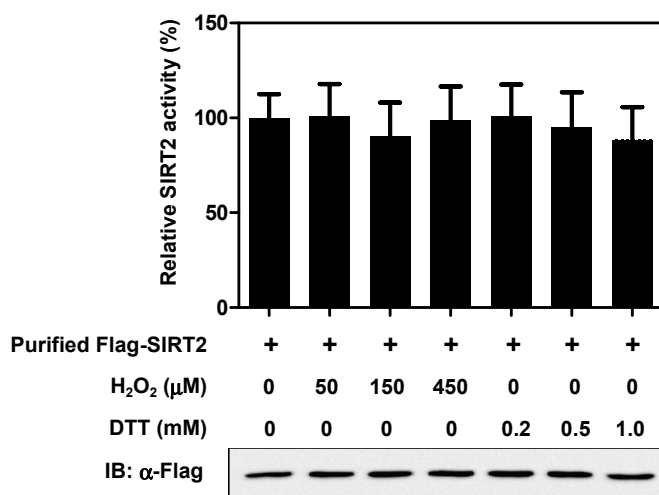

**Supplementary Fig.13 Chemical oxidants do not affect *SIRT2* mRNA expression**

**(A-B)** HEK293T cells were treated with 300 μM H<sub>2</sub>O<sub>2</sub> **(A)** or 50 μM menadione **(B)** for the indicated periods, and *SIRT2* mRNA expression was determined by quantitative real-time PCR.

**(C)** Flag-tagged SIRT2 was ectopically expressed in HEK293T cells, and then was purified by IP with Flag-beads. The purified Flag-SIRT2 was treated with

increasing concentrations of H<sub>2</sub>O<sub>2</sub> or DTT for 30 min at room temperature, eluted from the beads with Flag peptide, and eventually subjected to deacetylase activity assay as described in “Method”. Shown are average values with standard deviation (S.D.) of triplicated experiments. n.s.=not significant.
