# Supplementary material
Source: PubMed Central journal article supplement (PMC4194121)
Supplement: embj0033-1304-sd14.pdf [file embj0033-1304-sd14.pdf]

Wang et al. Supplementary Fig.14

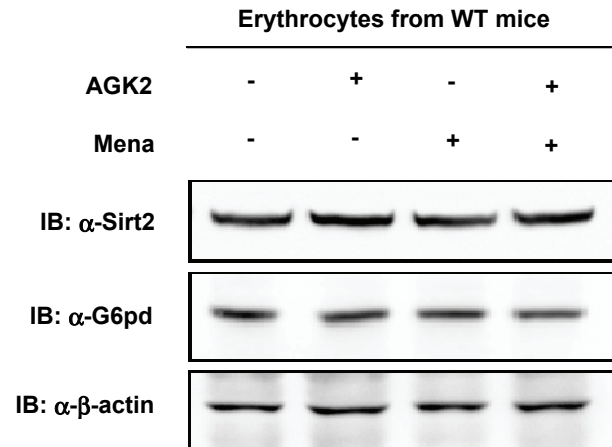

**Supplementary Fig.14 Treatment with menadione and/or AGK2 does not change the protein levels of endogenous G6pd and Sirt2 in mouse erythrocytes**

Freshly isolated erythrocytes from male wild-type mice (n=3) were treated with AGK2 (10  $\mu$ M for 4 hrs) and/or menadione (50  $\mu$ M for 30 min), and the expression of G6pd and Sirt2 proteins were determined by western blot analysis.
