# Supplementary material
Source: PubMed Central journal article supplement (PMC4194121)
Supplement: embj0033-1304-sd15.pdf [file embj0033-1304-sd15.pdf]

Wang et al. Supplementary Fig.15

**A**

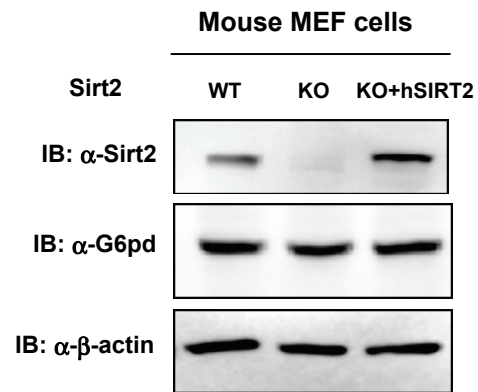

**B**

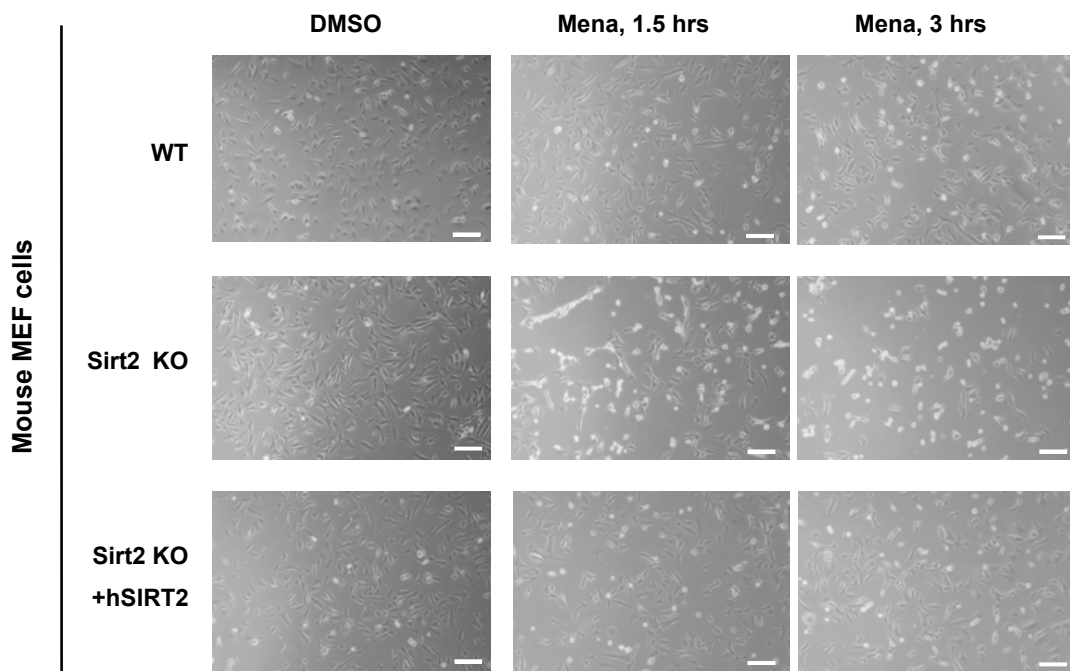

**Supplementary Fig.15 Deletion of Sirt2 sensitizes mouse MEF cells to menadione treatment**

**(A)** The protein levels of G6pd and Sirt2 in mouse MEF cells expressing wild-type Sirt2, or deficient for Sirt2, or deficient for Sirt2 and rescued by human SIRT2 were determined by western blot analysis.

**(B)** These mouse MEF cells were treated without or with menadione (50  $\mu$ M) for the indicated periods. The cells were imaged. Scale bars, 200  $\mu$ m.
