# Supplementary material
Source: PubMed Central journal article supplement (PMC4194121)
Supplement: embj0033-1304-sd16.pdf [file embj0033-1304-sd16.pdf]

## Supplementary Table

**Table S1. List of oligonucleotides and primer sequences used in this study**

| <b>Name</b> | <b>Sequence(5'-3')</b> | <b>Note</b> |
|-------------|------------------------|-------------|
| shG6PD      | GGCCGTCACCAAGAACATTCA  | shRNA       |
| siSIRT1-#1  | GCAGCAGCCAGATAACCTT    | siRNA       |
| siSIRT1-#2  | CCACCAGCATTAGGAACCTT   | siRNA       |
| siSIRT2-#1  | GGAGCTGGAATCTCCACAT    | siRNA       |
| siSIRT2-#2  | CCTCGCCAAGGAACTCTAT    | siRNA       |
| siATF2-#1   | GGAGCCTTCTGTTGTAGAA    | siRNA       |
| siATF2-#2   | CCCAATGTGCTGCTTACAA    | siRNA       |
| siATF2-#3   | GCTATCATACTGCTGATAA    | siRNA       |
| siKAT1-#1   | GCACAAACACGAATGATTT    | siRNA       |
| siKAT1-#2   | CCATGGTGCTCAACTTCTT    | siRNA       |
| siKAT1-#3   | GGAAGATTACCGGCGTGTT    | siRNA       |
| siKAT2A-#1  | CCGAGTGGAGAAGGACAAA    | siRNA       |
| siKAT2A-#2  | GCATGCCTAAGGAGTATAT    | siRNA       |
| siKAT2A-#3  | TCTTCTACTTCAAGCTCAA    | siRNA       |
| siKAT2B-#1  | GCAGATACCAAACAAGTTT    | siRNA       |
| siKAT2B-#2  | GCATCCAAACAGTTATCAA    | siRNA       |
| siKAT2B-#3  | CCGTATGTTCCCATCTCAA    | siRNA       |
| siKAT3A-#1  | GCAGCTGGTTCTACTGCTT    | siRNA       |
| siKAT3A-#2  | CCATTTCTCCTTCCCGAAT    | siRNA       |
| siKAT3A-#3  | GGAAGCAGCTGTGTACCAT    | siRNA       |
| siKAT3B-#1  | GCAGCTCAACCATCCACTA    | siRNA       |
| siKAT3B-#2  | CCAGCCAGCTGTAAGCATT    | siRNA       |
| siKAT3B-#3  | GCCAATTGCTCACTGCCAT    | siRNA       |
| siKAT4-#1   | GCAGGTAACACAGGAAGGT    | siRNA       |
| siKAT4-#2   | GGTGGGTATGAGGTATCAG    | siRNA       |
| siKAT4-#3   | GAGGAGGACAGTGAGGATT    | siRNA       |
| siKAT5-#1   | CCACAGGAACTCACCACAT    | siRNA       |
| siKAT5-#2   | GCAATGAGATTTACCGCAA    | siRNA       |
| siKAT5-#3   | GCTGATCGAGTTCAGCTAT    | siRNA       |
| siKAT6A-#1  | GCATGTGGATATGTCAAAT    | siRNA       |
| siKAT6A-#2  | GCTCTGAAGTGCAGATTAA    | siRNA       |
| siKAT6A-#3  | CCTCACATCTCCTTGCTT     | siRNA       |
| siKAT6B-#1  | GGACGACACCTTTCAGGAT    | siRNA       |
| siKAT6B-#2  | CCATCAGTTTCAGATCATT    | siRNA       |
| siKAT6B-#3  | CCACCCATCAGTCACAAAT    | siRNA       |
| siKAT7-#1   | GGAGAAGTTAAGGCTGCAA    | siRNA       |
| siKAT7-#2   | CCACCTGGTGATGAGATAT    | siRNA       |
| siKAT7-#3   | GCTGTCACTGATTGGATA     | siRNA       |

|                      |                       |         |
|----------------------|-----------------------|---------|
| <b>siKAT8-#1</b>     | GCAAGCATGATGAGATCAA   | siRNA   |
| <b>siKAT8-#2</b>     | GCCTGGTATTTCTCACCAT   | siRNA   |
| <b>siKAT8-#3</b>     | CCATAAGACACTGTACTTT   | siRNA   |
| <b>siKAT9-#1</b>     | GCCAAACGTGGGACTAGAA   | siRNA   |
| <b>siKAT9-#2</b>     | CCGAGTACAGAGGGATATT   | siRNA   |
| <b>siKAT9-#3</b>     | CCGGGATCCTACTAAATTT   | siRNA   |
| <b>siKAT12-#1</b>    | GCAGTTTCAGCTGCCGTTT   | siRNA   |
| <b>siKAT12-#2</b>    | GCAAGAGGCTCTTATGTAT   | siRNA   |
| <b>siKAT12-#3</b>    | GCACTGTAGTTTGTGTAAA   | siRNA   |
| <b>siKAT13A-#1</b>   | CCAGTACTTAGGTTACAA    | siRNA   |
| <b>siKAT13A-#2</b>   | CCAGTTCACAGAGCAGTAA   | siRNA   |
| <b>siKAT13A-#3</b>   | GGAAGCAATTGATAACCAA   | siRNA   |
| <b>siKAT13B-#1</b>   | GCTGATATCTGCCAATCTT   | siRNA   |
| <b>siKAT13B-#2</b>   | CCAGTAACATAGCTTCATT   | siRNA   |
| <b>siKAT13B-#3</b>   | CCGGCAGAATGGAACCTAT   | siRNA   |
| <b>siKAT13C-#1</b>   | GGAACAGCCATACCTTCAA   | siRNA   |
| <b>siKAT13C-#2</b>   | GCACTGAGCTGGACAACCT   | siRNA   |
| <b>siKAT13C-#3</b>   | CCAGCCACTTATGAATCAA   | siRNA   |
| <b>siKAT13D-#1</b>   | GCTGGAAAGTGACTCATT    | siRNA   |
| <b>siKAT13D-#2</b>   | GGAAATGTGTAAGTTGAA    | siRNA   |
| <b>siKAT13D-#3</b>   | GGTACCAAGTACCATGCTT   | siRNA   |
| <b>siKAT14-#1</b>    | GGAACAGCTCAGTTACCTT   | siRNA   |
| <b>siKAT14-#2</b>    | GGAGCCAAAGAAGGAGGAA   | siRNA   |
| <b>siKAT14-#3</b>    | GCTACTGTACCAGAAGTTT   | siRNA   |
| <b>ATF2-Forward</b>  | GGTGCTTTGTAAACACGGCT  | qRT-PCR |
| <b>ATF2-Reverse</b>  | GCACTCCTTTCTCAAGTTTCC | qRT-PCR |
| <b>KAT1-Forward</b>  | AACACCAACACAGCAATTGAA | qRT-PCR |
| <b>KAT1-Reverse</b>  | CATCCCCAAAGAGTTGATGG  | qRT-PCR |
| <b>KAT2A-Forward</b> | GTGCTGTACCTCGAATGAG   | qRT-PCR |
| <b>KAT2A-Reverse</b> | CGGCGTAGGTGAGGAAGTAG  | qRT-PCR |
| <b>KAT2B-Forward</b> | GGCCAAGAACTGGAGAACT   | qRT-PCR |
| <b>KAT2B-Reverse</b> | GGTGAGGGGTTAGGGTTTTT  | qRT-PCR |
| <b>KAT3A-Forward</b> | TGAGACCCTAACGCAGGTTT  | qRT-PCR |
| <b>KAT3A-Reverse</b> | CAAATGGACTTGTGTTCCCA  | qRT-PCR |
| <b>KAT3B-Forward</b> | GCGGCCTAAACTCTCATCTC  | qRT-PCR |
| <b>KAT3B-Reverse</b> | TCTGGTAAGTCGTGCTCCAA  | qRT-PCR |
| <b>KAT4-Forward</b>  | AGAGTCGGGAGAGCTTTCTG  | qRT-PCR |
| <b>KAT4-Reverse</b>  | CACAATCTCCTGGGCAGTCT  | qRT-PCR |
| <b>KAT5-Forward</b>  | CATCCTCCAGGCAATGAGAT  | qRT-PCR |
| <b>KAT5-Reverse</b>  | CTTGCCAAAAGACACAGGT   | qRT-PCR |
| <b>KAT6A-Forward</b> | CGTGGATGGGAAAGAGAGTT  | qRT-PCR |
| <b>KAT6A-Reverse</b> | ACAGATGGGGATTGGTTCAG  | qRT-PCR |
| <b>KAT6B-Forward</b> | AAAGGGGCACCTCAGTATCC  | qRT-PCR |

|                       |                         |         |
|-----------------------|-------------------------|---------|
| <b>KAT6B-Reverse</b>  | CATATTGGAATGGGATCAGCA   | qRT-PCR |
| <b>KAT7-Forward</b>   | TGAAGTGTCTACACCAGGC     | qRT-PCR |
| <b>KAT7-Reverse</b>   | TGATACAGTGGGCATCCTGA    | qRT-PCR |
| <b>KAT8-Forward</b>   | GATCACTCGCAACCAAAAGC    | qRT-PCR |
| <b>KAT8-Reverse</b>   | CCTCATGCTCCTTCTCCAAG    | qRT-PCR |
| <b>KAT9-Forward</b>   | GAAGAACATGGGTCTGGGAA    | qRT-PCR |
| <b>KAT9-Reverse</b>   | CGGGCCTTGTAATCTGTAGC    | qRT-PCR |
| <b>KAT12-Forward</b>  | GCTCAACAGCTGTCTCCTCA    | qRT-PCR |
| <b>KAT12-Reverse</b>  | AAAGTCTGACTGACCGTGGG    | qRT-PCR |
| <b>KAT13A-Forward</b> | TCTGAGGGGCTTAGAAATTAACA | qRT-PCR |
| <b>KAT13A-Reverse</b> | TGATGTTTTCCAGAGATGGCT   | qRT-PCR |
| <b>KAT13B-Forward</b> | CCGATTTAAAGCTGAGCTGC    | qRT-PCR |
| <b>KAT13B-Reverse</b> | CAGTCAAAGGATGTTCAAGCA   | qRT-PCR |
| <b>KAT13C-Forward</b> | CACCTGACGGCGTGACC       | qRT-PCR |
| <b>KAT13C-Reverse</b> | TCAGCAACTGTGCCTGTAAAC   | qRT-PCR |
| <b>KAT13D-Forward</b> | GAAGGAAATCTGGCCGC       | qRT-PCR |
| <b>KAT13D-Reverse</b> | TCCAAAGGCATTTACAATGTG   | qRT-PCR |
| <b>KAT14-Forward</b>  | CTGGACAAGCCACGTACAGA    | qRT-PCR |
| <b>KAT14-Reverse</b>  | TCTGGTGTGAAATCCCTTC     | qRT-PCR |
| <b>ACTB-Forward</b>   | GCACAGAGCCTCGCCTT       | qRT-PCR |
| <b>ACTB-Reverse</b>   | GTTGTCGACGACGAGCG       | qRT-PCR |
| <b>SIRT2-Forward</b>  | ATGTCTGCTTCTCCACCAGC    | qRT-PCR |
| <b>SIRT2-Reverse</b>  | GGTCGGTGACAGCCTCAAG     | qRT-PCR |
| <b>SIRT1-Forward</b>  | AGAGATGGCTGGAATTGTCC    | qRT-PCR |
| <b>SIRT1-Reverse</b>  | CCAGATCCTCAAGCGATGTT    | qRT-PCR |
